# Supplementary material for: Association between smoking and hypertension under different PM2.5 and green space exposure: A nationwide cross-sectional study
Source: PubMed Central journal article supplement (PMC9712966; doi:10.3389/fpubh.2022.1026648), 2022-11-17
Supplement: Data_Sheet_1.pdf [file Data_Sheet_1.pdf]

## Supplementary Tables

**Supplementary Table 1.** ORs of hypertension (with 95% confidence intervals, 95%CI) associated with smoking stratified by a single environmental factor and age

| Age                        | Variable       | By NDVI <sup>a</sup>   |                        |                         |                      | P for ORs | By PM <sub>2.5</sub> <sup>b</sup>   |                     |                                      |                       |           |
|----------------------------|----------------|------------------------|------------------------|-------------------------|----------------------|-----------|-------------------------------------|---------------------|--------------------------------------|-----------------------|-----------|
|                            |                | Low-NDVI<br>(n = 5258) |                        | High-NDVI<br>(n = 5342) |                      |           | Low-PM <sub>2.5</sub><br>(n = 5248) |                     | High-PM <sub>2.5</sub><br>(n = 5352) |                       | P for ORs |
|                            |                | n                      | OR (95%CI)             | n                       | OR (95%CI)           |           | n                                   | OR (95%CI)          | n                                    | OR (95%CI)            |           |
| Middle - aged<br>(45 - 64) | Never smoking  | 2277                   | -                      | 2314                    | -                    | 0.008     | 2258                                | -                   | 2333                                 | -                     |           |
|                            | Former smoker  | 1043                   | 1.106 (1.049,1.167)*** | 1061                    | 1.000 (0.949,1.052)  | 0.008     | 1076                                | 1.044 (0.991,1.100) | 1028                                 | 1.056 (1.002,1.113)** | 0.760     |
|                            | Current smoker | 334                    | 1.063 (1.018,1.110)*** | 358                     | 0.961 (0.921,1.003)* | 0.001     | 320                                 | 1.002 (0.960,1.046) | 372                                  | 1.021 (0.978,1.066)   | 0.545     |
| Elder<br>(> 64)            | Never smoking  | 951                    | -                      | 937                     | -                    |           | 961                                 | -                   | 927                                  | -                     |           |
|                            | Former smoker  | 355                    | 1.055 (0.982,1.133)    | 387                     | 1.052 (0.983,1.126)  | 0.955     | 367                                 | 1.030 (0.963,1.102) | 375                                  | 1.088 (1.013,1.168)** | 0.273     |
|                            | Current smoker | 298                    | 1.056 (0.986,1.131)    | 285                     | 1.052 (0.983,1.127)  | 0.939     | 266                                 | 1.064 (0.994,1.138) | 317                                  | 1.057 (0.986,1.132)   | 0.894     |

<sup>a</sup> Gender, education level, alcohol consumption, daily cigarette consumption, social activity, physical activity, sleep time, per capita GDP, NO<sub>2</sub>, PM<sub>2.5</sub>, and O<sub>3</sub> were controlled as covariates in the model.

<sup>b</sup> Gender, education level, alcohol consumption, daily cigarette consumption, social activity, physical activity, sleep time, per capita GDP, NDVI, NO<sub>2</sub>, and O<sub>3</sub> were controlled as covariates in the model.

Notes: (1) \*\*\*p < 0.01; \*\*p < 0.05; \*p < 0.10 (2) In all models, the GVIFs were less than 1.883. (3) P for ORs < 0.05 means that there was a significant difference in the ORs of the different exposure concentration groups.

**Supplementary Table 2.** Definition of each group in the dual environmental factor stratified analysis <sup>a</sup>

| Group                            | NDVI exposure                                  | PM <sub>2.5</sub> exposure                     |
|----------------------------------|------------------------------------------------|------------------------------------------------|
| Low-NDVI/Low-PM <sub>2.5</sub>   | Below the median of the study population       | Below the median of the study population       |
| Low-NDVI/High-PM <sub>2.5</sub>  | Below the median of the study population       | Higher than the median of the study population |
| High-NDVI/Low-PM <sub>2.5</sub>  | Higher than the median of the study population | Below the median of the study population       |
| High-NDVI/High-PM <sub>2.5</sub> | Higher than the median of the study population | Higher than the median of the study population |

<sup>a</sup> The exposure period of the study population is one year

**Supplementary Table 3.** ORs of hypertension (with 95% confidence intervals, 95%CI) associated with smoking stratified by a single environmental factor in the different exposure periods

| Period         | Variable       | By NDVI <sup>a</sup> |                        |           |                     |           | By PM <sub>2.5</sub> <sup>b</sup> |                      |                        |                        |           |
|----------------|----------------|----------------------|------------------------|-----------|---------------------|-----------|-----------------------------------|----------------------|------------------------|------------------------|-----------|
|                |                | Low-NDVI             |                        | High-NDVI |                     | P for ORs | Low-PM <sub>2.5</sub>             |                      | High-PM <sub>2.5</sub> |                        | P for ORs |
|                |                | n                    | OR (95%CI)             | n         | OR (95%CI)          |           | n                                 | OR (95%CI)           | n                      | OR (95%CI)             |           |
| Half -<br>year | Never smoking  | 3181                 | -                      | 3298      | -                   |           | 3203                              | -                    | 3276                   | -                      |           |
|                | Former smoker  | 635                  | 1.070 (1.025,1.116)*** | 640       | 1.014 (0.974,1.055) | 0.071     | 579                               | 1.008 (0.967,1.051)  | 696                    | 1.066 (1.023,1.111)*** | 0.061     |
|                | Current smoker | 1388                 | 1.056 (1.018,1.096)*** | 1458      | 0.993 (0.958,1.029) | 0.018     | 1401                              | 0.998 (0.962,1.035)  | 1445                   | 1.047 (1.010,1.086)**  | 0.066     |
| Two -<br>year  | Never smoking  | 3215                 | -                      | 3264      | -                   |           | 3176                              | -                    | 3303                   | -                      |           |
|                | Former smoker  | 643                  | 1.075 (1.030,1.121)*** | 632       | 1.007 (0.967,1.049) | 0.029     | 581                               | 1.039 (0.997,1.083)* | 694                    | 1.039 (0.997,1.083)*   | 0.999     |
|                | Current smoker | 1401                 | 1.059 (1.021,1.098)*** | 1445      | 0.990 (0.955,1.026) | 0.010     | 1419                              | 1.031 (0.994,1.069)  | 1427                   | 1.017 (0.981,1.055)    | 0.602     |

<sup>a</sup> Gender, education level, alcohol consumption, daily cigarette consumption, social activity, physical activity, sleep time, per capita GDP, NO<sub>2</sub>, PM<sub>2.5</sub>, and O<sub>3</sub> were controlled as covariates in the model.

<sup>b</sup> Gender, education level, alcohol consumption, daily cigarette consumption, social activity, physical activity, sleep time, per capita GDP, NDVI, NO<sub>2</sub>, and O<sub>3</sub> were controlled as covariates in the model.

Notes: (1) \*\*\*p < 0.01; \*\*p < 0.05; \*p < 0.10 (2) In all models, the GVIFs were less than 1.806. (3) P for ORs < 0.05 means that there was a significant difference in the ORs of the different exposure concentration groups.

**Supplementary Table 4.** ORs of hypertension (with 95% confidence intervals, 95%CI) associated with smoking stratified by dual environmental factors in the different exposure periods <sup>a</sup>

| Period         | Variable       | Low-NDVI/Low-PM <sub>2.5</sub> |                     |           | Low-NDVI/High-PM <sub>2.5</sub> |                        |           | High-NDVI/Low-PM <sub>2.5</sub> |                     |           | High-NDVI/High-PM <sub>2.5</sub> |                     |           |
|----------------|----------------|--------------------------------|---------------------|-----------|---------------------------------|------------------------|-----------|---------------------------------|---------------------|-----------|----------------------------------|---------------------|-----------|
|                |                | n                              | OR (95% CI)         | P for ORs | n                               | OR (95% CI)            | P for ORs | n                               | OR (95% CI)         | P for ORs | n                                | OR (95% CI)         | P for ORs |
| Half -<br>year | Never smoking  | 1428                           | -                   |           | 1753                            | -                      |           | 1775                            | -                   |           | 1523                             | -                   |           |
|                | Former smoker  | 265                            | 1.025 (0.962,1.091) | 0.074     | 370                             | 1.108 (1.046,1.174)*** | -         | 314                             | 0.996 (0.942,1.052) | 0.009     | 326                              | 1.026 (0.967,1.089) | 0.069     |
|                | Current smoker | 593                            | 1.024 (0.97,1.082)  | 0.138     | 795                             | 1.083 (1.030,1.138)*** | -         | 808                             | 0.973 (0.927,1.022) | 0.003     | 650                              | 1.01 (0.958,1.065)  | 0.060     |
| Two -<br>year  | Never smoking  | 1379                           | -                   |           | 1836                            | -                      |           | 1797                            | -                   |           | 1467                             | -                   |           |
|                | Former smoker  | 281                            | 1.059 (0.994,1.128) | 0.549     | 362                             | 1.087 (1.026,1.152)*** | -         | 300                             | 0.993 (0.935,1.054) | 0.033     | 332                              | 1.019 (0.964,1.077) | 0.112     |
|                | Current smoker | 609                            | 1.042 (0.986,1.101) | 0.497     | 792                             | 1.069 (1.018,1.123)*** | -         | 810                             | 0.960 (0.910,1.014) | 0.004     | 635                              | 1.017 (0.968,1.067) | 0.157     |

<sup>a</sup> Gender, age, education level, alcohol consumption, daily cigarette consumption, social activity, physical activity, sleep time, per capita GDP, NO<sub>2</sub> and O<sub>3</sub> were controlled as covariates in the model.

Notes: (1) \*\*\*p < 0.01; \*\*p < 0.05; \*p < 0.10. (2) In all models, the GVIFs were less than 1.822. (3) P for ORs < 0.05 means that there was a significant OR difference between this group and the Low-NDVI/High-PM<sub>2.5</sub> group.
